# Supplementary material for: Tolerance of Wheat to Soil Sodicity Can Be Better Detected through an Incremental Crop Tolerance Approach and Ascertained through Multiple Sowing Times
Source: MDPI journal article supplement (doi:10.3390/agronomy11081571), 2021-08-06
Supplement: s1 [file s1]

## Supplementary materials:

**Table S1.** Monthly average weather conditions in the trial sites during the seasons 2018 and 2019 at Merredin

| Month     | Air Temp; min |      | Air Temp; max |      | Rain mm |      | Rainy Days |      |
|-----------|---------------|------|---------------|------|---------|------|------------|------|
|           | 2018          | 2019 | 2018          | 2019 | 2018    | 2019 | 2018       | 2019 |
| January   | 11.5          | 12.3 | 42.1          | 44.6 | 22.8    | 0.2  | 6          | 1    |
| February  | 13.3          | 13   | 42.6          | 44   | 14.4    | 1    | 2          | 2    |
| March     | 9.6           | -6.6 | 38.1          | 38.6 | 20.8    | 12.8 | 3          | 5    |
| April     | 6.6           | 3.5  | 34            | 36.3 | 0.8     | 12.4 | 2          | 5    |
| May       | 3.2           | -1.4 | 28.5          | 28.8 | 11.6    | 5.8  | 5          | 3    |
| June      | 1.4           | 1.3  | 25.2          | 23.3 | 41.4    | 76   | 14         | 16   |
| July      | 0.8           | 1.8  | 21.2          | 20.9 | 58.8    | 37.8 | 13         | 17   |
| August    | 0.3           | -0.3 | 23.8          | 27.8 | 68.8    | 51   | 15         | 13   |
| September | 0.1           | -0.8 | 31.5          | 33.5 | 4.4     | 3    | 2          | 4    |
| October   | 4.9           | 5.8  | 34.7          | 36.4 | 44.4    | 22.4 | 10         | 5    |
| November  | 4.6           | 7.3  | 38            | 43.2 | 13.4    | 0.2  | 3          | 1    |
| December  | 11.9          | 12.2 | 40.9          | 42.4 | 17.2    | 0.6  | 3          | 1    |

**Table S2.** Country of origin, AUS and IG No, and pedigree of wheat lines used.

| WA         | OTHER     |        | COUNTRY OF |                                                            |
|------------|-----------|--------|------------|------------------------------------------------------------|
| Accession# | NAME ID   | IG NO. | ORIGIN     | Pedigree                                                   |
| Condo      |           |        | AUSTRALIA  | Young/VR0525                                               |
| Krichauff  |           |        | AUSTRALIA  | WARIQUAM//KLOKA/PITIC-62/3/WARIMEK/HALBERD/4/3-AG-3/AROONA |
| Magenta    |           |        | AUSTRALIA  | Carnamah/Tammin-18                                         |
| Ninja      |           |        | AUSTRALIA  | Calingiri/Wyalkatchem                                      |
| Scepter    |           |        | AUSTRALIA  | RAC1480//Mace                                              |
| WA005      | ALEPPO 33 | 138786 | SYRIA      | Traditional cultivar/Landrace                              |
| WA034w     | PERSIA 58 | 138844 | IRAN       | Traditional cultivar/Landrace                              |
| WA134      |           | 42034  | EGYPT      | Traditional cultivar/Landrace                              |
| WA194      |           | 93133  | ALGERIA    | Traditional cultivar/Landrace                              |
| WA250      |           | 108711 | INDIA      | Traditional cultivar/Landrace                              |
| WA325      |           | 138729 | UKRAINE    | Traditional cultivar/Landrace                              |
| WA332      |           | 141111 | IRAN       | Traditional cultivar/Landrace                              |
| WA345      |           | 141125 | EGYPT      | Traditional cultivar/Landrace                              |
| WA377      |           | 141160 | INDIA      | Traditional cultivar/Landrace                              |
| WA143      |           | 43352  | ALGERIA    | Traditional cultivar/Landrace                              |

**Table S3.** Yield and leave tissue mineral concentrations in the lines grown at the sodic and non-sodic site in TOS1

| Site  | Line      | Yield | Al    | Ca (%) | K (%) | Na (%) | Mg    | P (%) | S (%) | B     | Zn   | Cu   | Mn    | Fe    | K:NA |
|-------|-----------|-------|-------|--------|-------|--------|-------|-------|-------|-------|------|------|-------|-------|------|
| Non-  | Condo     | 1.39  | 103.0 | 0.430  | 1.93  | 0.011  | 0.217 | 0.237 | 0.303 | 18.5  | 20.3 | 4.10 | 81.0  | 112.3 | 5.21 |
|       | Krichauff | 1.44  | 116.7 | 0.233  | 1.77  | 0.011  | 0.157 | 0.200 | 0.283 | 15.8  | 17.3 | 4.83 | 42.3  | 116.7 | 5.10 |
|       | Magenta   | 1.09  | 101.0 | 0.270  | 2.41  | 0.013  | 0.170 | 0.243 | 0.287 | 22.7  | 19.3 | 4.10 | 38.0  | 103.3 | 5.33 |
|       | Ninja     | 1.56  | 91.7  | 0.390  | 1.93  | 0.007  | 0.197 | 0.220 | 0.303 | 9.1   | 19.3 | 3.73 | 78.7  | 103.3 | 5.60 |
|       | Scepter   | 1.64  | 120.0 | 0.317  | 2.09  | 0.009  | 0.178 | 0.225 | 0.292 | 19.5  | 20.8 | 4.67 | 64.7  | 110.0 | 5.52 |
|       | WA005     | 0.74  | 44.7  | 0.233  | 1.60  | 0.013  | 0.153 | 0.157 | 0.260 | 9.6   | 16.7 | 3.67 | 37.0  | 81.7  | 4.87 |
|       | WA034w    | 0.86  | 45.3  | 0.473  | 1.61  | 0.011  | 0.197 | 0.167 | 0.277 | 7.2   | 16.0 | 3.67 | 66.0  | 74.3  | 4.96 |
|       | WA134     | 1.45  | 92.3  | 0.480  | 1.47  | 0.010  | 0.213 | 0.163 | 0.283 | 7.8   | 13.7 | 3.27 | 83.0  | 101.3 | 5.01 |
|       | WA143     | 1.25  | 82.0  | 0.307  | 1.71  | 0.009  | 0.187 | 0.210 | 0.307 | 8.7   | 24.0 | 2.83 | 36.7  | 86.3  | 5.21 |
|       | WA194     | 1.25  | 57.7  | 0.430  | 1.71  | 0.019  | 0.197 | 0.163 | 0.273 | 7.5   | 19.0 | 2.67 | 59.0  | 71.3  | 4.63 |
|       | WA250     | 1.21  | 96.7  | 0.353  | 1.49  | 0.016  | 0.243 | 0.183 | 0.283 | 18.4  | 17.0 | 3.30 | 68.7  | 103.3 | 4.56 |
|       | WA325     | 1.41  | 68.7  | 0.457  | 1.55  | 0.016  | 0.217 | 0.147 | 0.270 | 5.9   | 12.0 | 2.83 | 49.0  | 88.7  | 4.71 |
|       | WA332     | 0.39  | 83.7  | 0.147  | 2.25  | 0.004  | 0.077 | 0.180 | 0.277 | 13.0  | 16.0 | 3.93 | 26.7  | 90.0  | 6.24 |
|       | WA345     | 1.15  | 59.0  | 0.420  | 1.83  | 0.014  | 0.250 | 0.180 | 0.307 | 14.5  | 20.0 | 3.57 | 59.0  | 81.0  | 4.75 |
|       | WA377     | 1.14  | 44.0  | 0.433  | 1.49  | 0.017  | 0.267 | 0.150 | 0.270 | 9.5   | 16.3 | 3.07 | 74.0  | 83.7  | 4.47 |
| Sodic | Condo     | 1.80  | 120.0 | 0.310  | 1.83  | 0.011  | 0.253 | 0.240 | 0.300 | 133.3 | 17.0 | 5.43 | 106.7 | 120.0 | 5.13 |
|       | Krichauff | 1.79  | 110.0 | 0.213  | 1.66  | 0.009  | 0.167 | 0.200 | 0.270 | 47.3  | 14.0 | 5.63 | 61.3  | 110.0 | 5.15 |
|       | Magenta   | 1.48  | 120.0 | 0.233  | 2.43  | 0.008  | 0.187 | 0.227 | 0.310 | 100.3 | 17.7 | 6.63 | 74.0  | 110.0 | 5.61 |
|       | Ninja     | 1.99  | 126.7 | 0.220  | 2.16  | 0.007  | 0.180 | 0.223 | 0.327 | 142.0 | 16.7 | 5.90 | 97.0  | 120.0 | 5.65 |
|       | Scepter   | 2.21  | 122.3 | 0.242  | 2.10  | 0.007  | 0.210 | 0.230 | 0.318 | 64.7  | 17.5 | 6.05 | 98.8  | 120.0 | 5.69 |

| Site          | Line     | Yield | Al     | Ca (%) | K (%) | Na (%) | Mg    | P (%)  | S (%)  | B      | Zn     | Cu    | Mn    | Fe    | K:NA |
|---------------|----------|-------|--------|--------|-------|--------|-------|--------|--------|--------|--------|-------|-------|-------|------|
|               | WA005    | 0.71  | 132.7  | 0.137  | 1.72  | 0.013  | 0.147 | 0.180  | 0.253  | 98.3   | 12.7   | 6.03  | 41.3  | 111.3 | 4.89 |
|               | WA034w   | 1.10  | 58.3   | 0.323  | 1.97  | 0.015  | 0.200 | 0.187  | 0.280  | 68.3   | 15.7   | 6.17  | 80.7  | 91.0  | 4.91 |
|               | WA134    | 1.90  | 91.0   | 0.253  | 1.63  | 0.011  | 0.183 | 0.173  | 0.240  | 130.0  | 13.0   | 5.63  | 94.0  | 97.0  | 4.99 |
|               | WA143    | 1.55  | 95.0   | 0.197  | 1.56  | 0.008  | 0.170 | 0.177  | 0.260  | 39.3   | 15.0   | 6.63  | 41.7  | 115.7 | 5.22 |
|               | WA194    | 1.52  | 85.0   | 0.293  | 1.65  | 0.014  | 0.210 | 0.160  | 0.240  | 85.7   | 13.7   | 5.10  | 72.0  | 92.7  | 4.71 |
|               | WA250    | 1.54  | 62.3   | 0.203  | 1.59  | 0.021  | 0.213 | 0.183  | 0.260  | 105.0  | 13.0   | 5.50  | 71.3  | 85.3  | 4.39 |
|               | WA325    | 1.64  | 81.0   | 0.307  | 1.86  | 0.015  | 0.173 | 0.147  | 0.240  | 38.3   | 11.3   | 5.00  | 69.3  | 89.3  | 4.79 |
|               | WA332    | 0.15  | 90.7   | 0.073  | 2.44  | 0.005  | 0.067 | 0.190  | 0.227  | 106.7  | 13.3   | 6.10  | 19.7  | 88.0  | 6.23 |
|               | WA345    | 1.45  | 78.7   | 0.517  | 1.40  | 0.022  | 0.323 | 0.137  | 0.283  | 63.3   | 11.0   | 5.23  | 136.7 | 116.7 | 4.33 |
|               | WA377    | 1.17  | 50.3   | 0.287  | 1.43  | 0.022  | 0.240 | 0.167  | 0.243  | 63.7   | 13.7   | 6.53  | 110.0 | 87.7  | 4.24 |
| P-<br>values: | Genotype |       | <0.001 | na     | na    | na     | na    | <0.001 | na     | na     | <0.001 | na    | na    | na    |      |
|               | Env:Gen  |       | 0.065  | 0.023  | 0.127 | 0.002  | 0.005 | 0.321  | <0.001 | <0.001 | 0.078  | 0.001 | 0.005 | 0.048 |      |
|               | Across   |       | 37.39  | 0.103  | 0.304 | 0.004  | 0.052 | 0.032  | 0.026  | 28.1   | 3.9    | 0.851 | 23.17 | 20.41 |      |
| LSD:          | Within   |       | 37.15  | 0.093  | 0.283 | 0.004  | 0.046 | 0.03   | 0.025  | 25.1   | 3.56   | 0.839 | 21.7  | 19.77 |      |
